# Supplementary material for: Brazilian propolis ethanol extract and its component kaempferol induce myeloid-derived suppressor cells from macrophages of mice in vivo and in vitro
Source: Springer Nature journal article supplement (doi:10.1186/s12906-018-2198-5), 2018-05-02

# Mesenteric adipose tissue of C57BL/6 *ob/ob* mice (eosinophil)

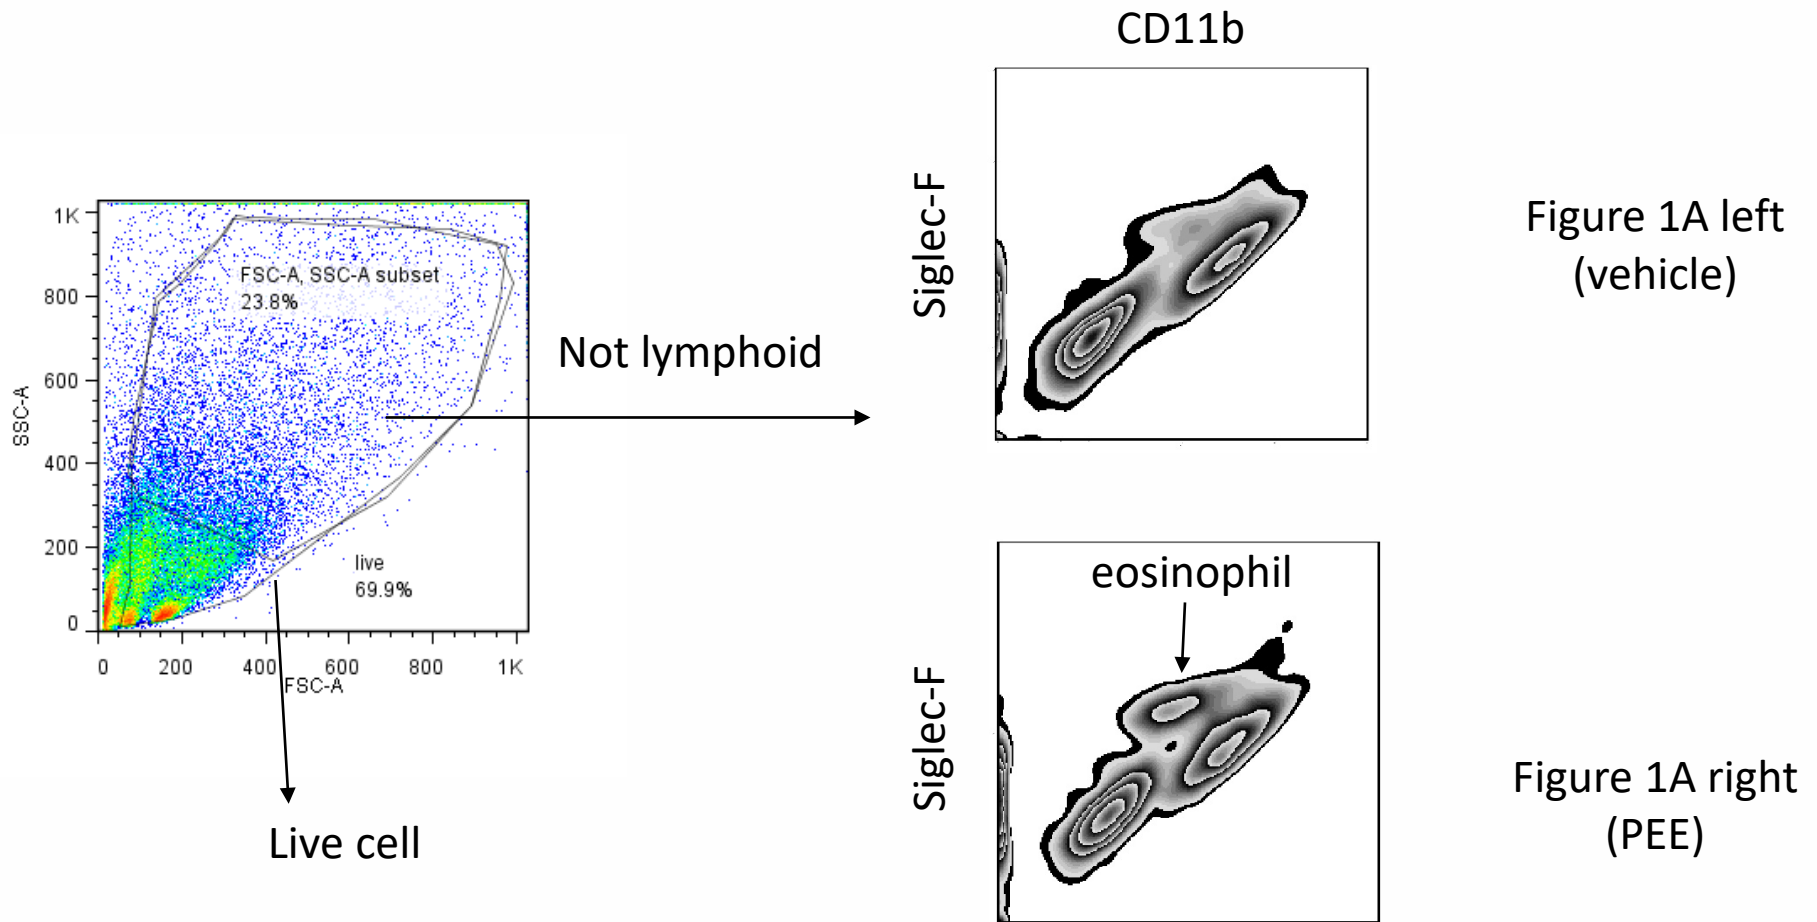

Data were obtained using a FACS Canto II (BD Bioscience).

# Mesenteric adipose tissue of C57BL/6 *ob/ob* mice (macrophage and MDSC)

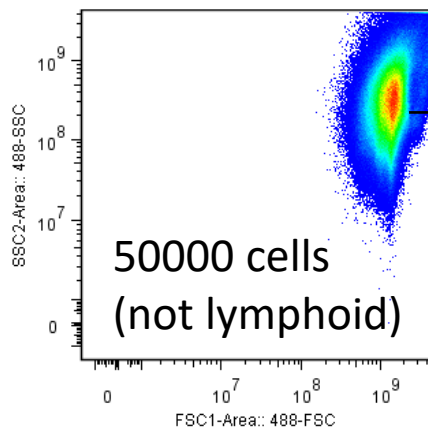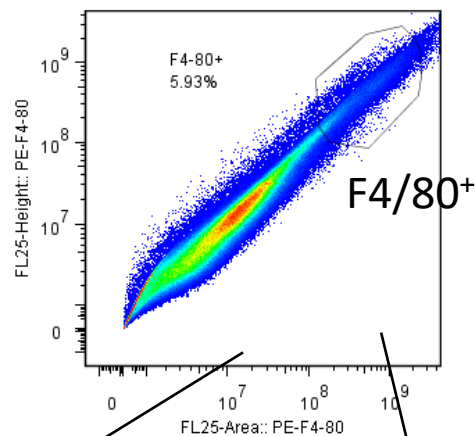

Fig1.B Left  
(vehicle)

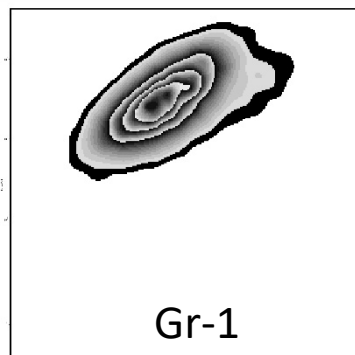

Fig1.B Right  
(PEE)

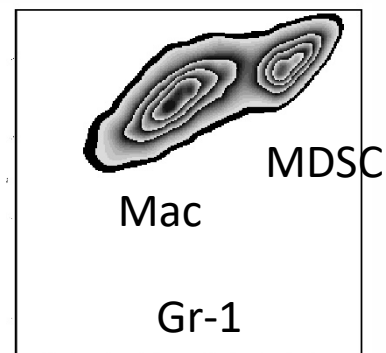

Data were obtained using a MoFlo Astorios(Beckman Coulter).

# Mesenteric adipose tissue of HFD-induced obese C57BL/6 mice

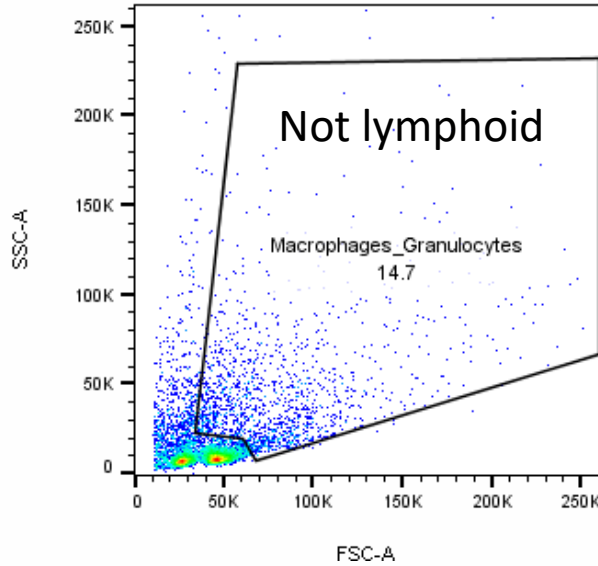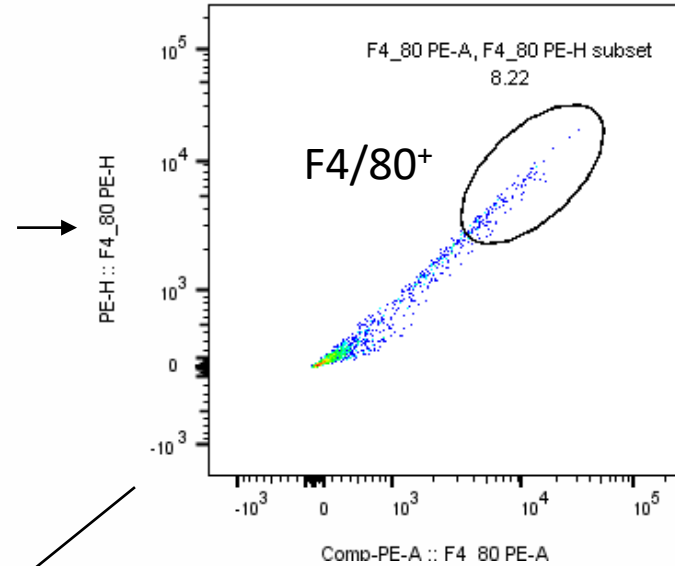

Fig2.A Left  
(vehicle)

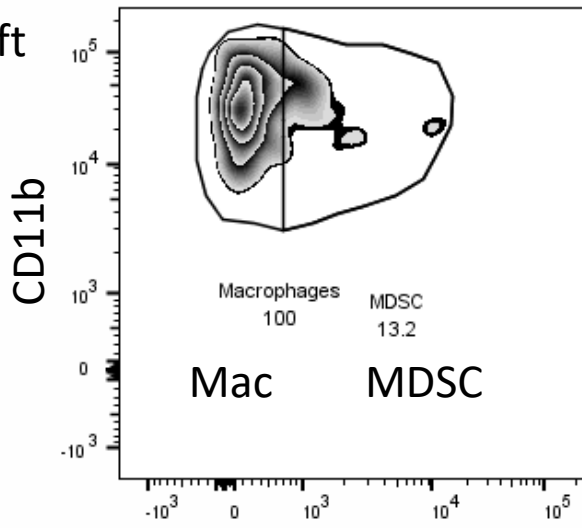

Fig2.A Right  
(PEE)

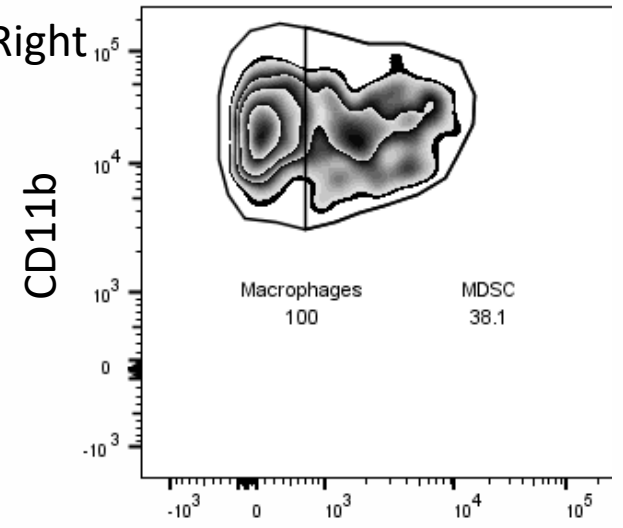

Data were obtained using FACS Canto II (BD Bioscience).

# Epididymal adipose tissue of HFD-induced obese C57BL/6 mice

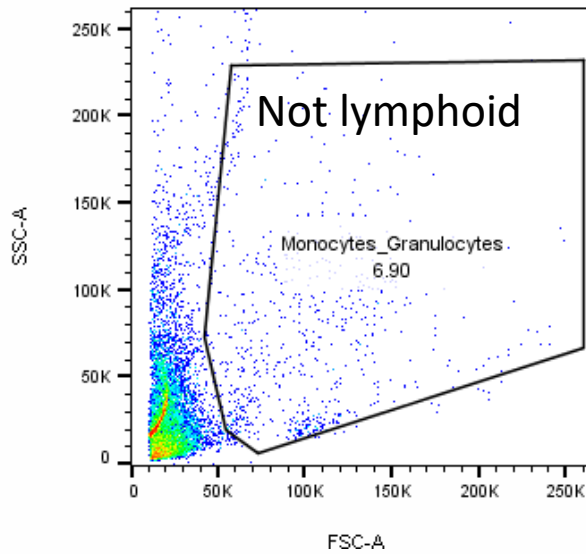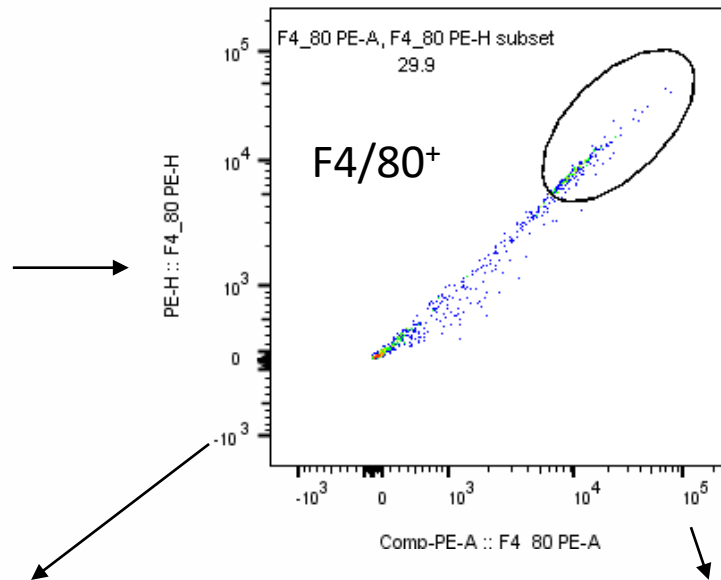

Fig2.C Left  
(vehicle)

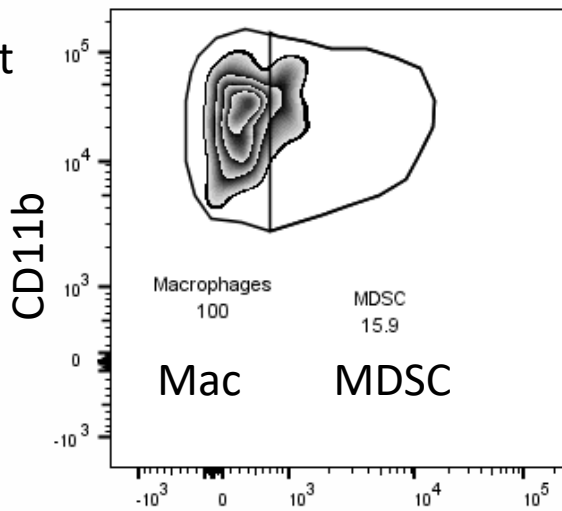

Fig2.C Right  
(PEE)

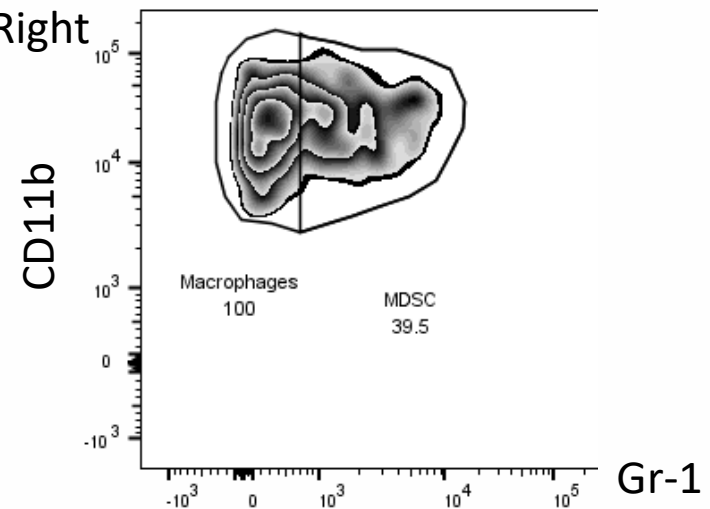

Data were obtained using FACS Canto II (BD Bioscience).

# Epididymal adipose tissue of lean C57BL/6 mice

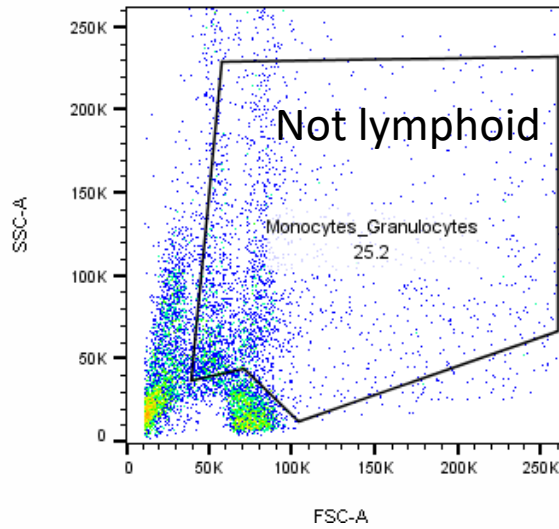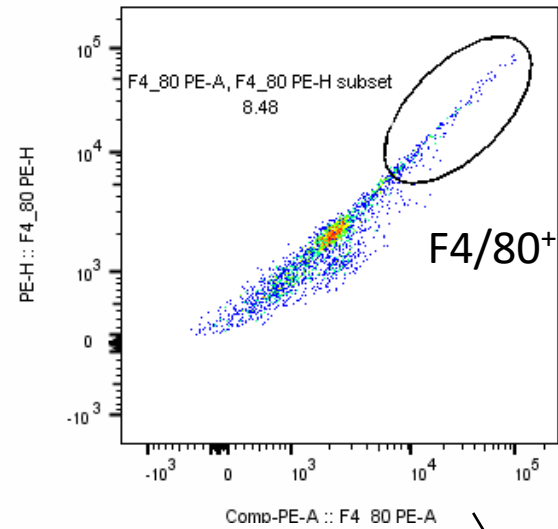

Fig3.A Left  
(vehicle)

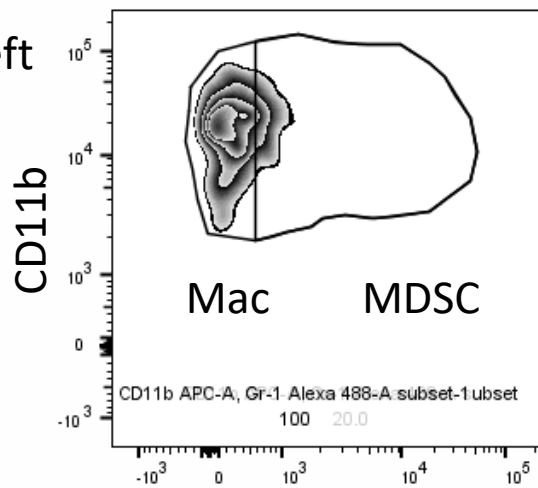

Fig3.A Right  
(PEE)

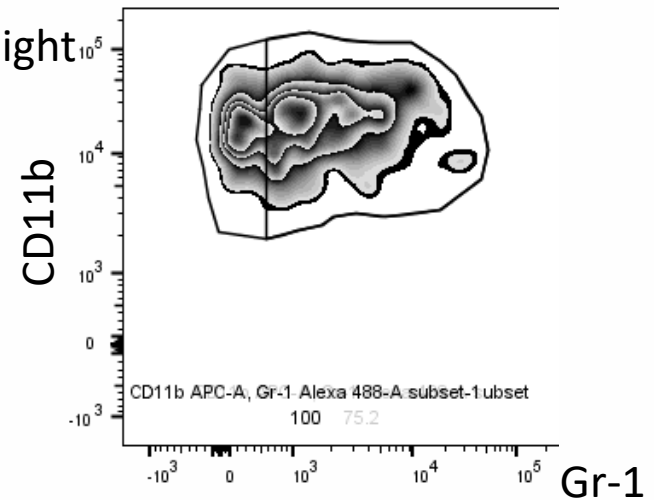

Data were obtained using a FACSVerse (BD Bioscience).

# Peritoneal cells of HFD-induced obese C57BL/6 mice

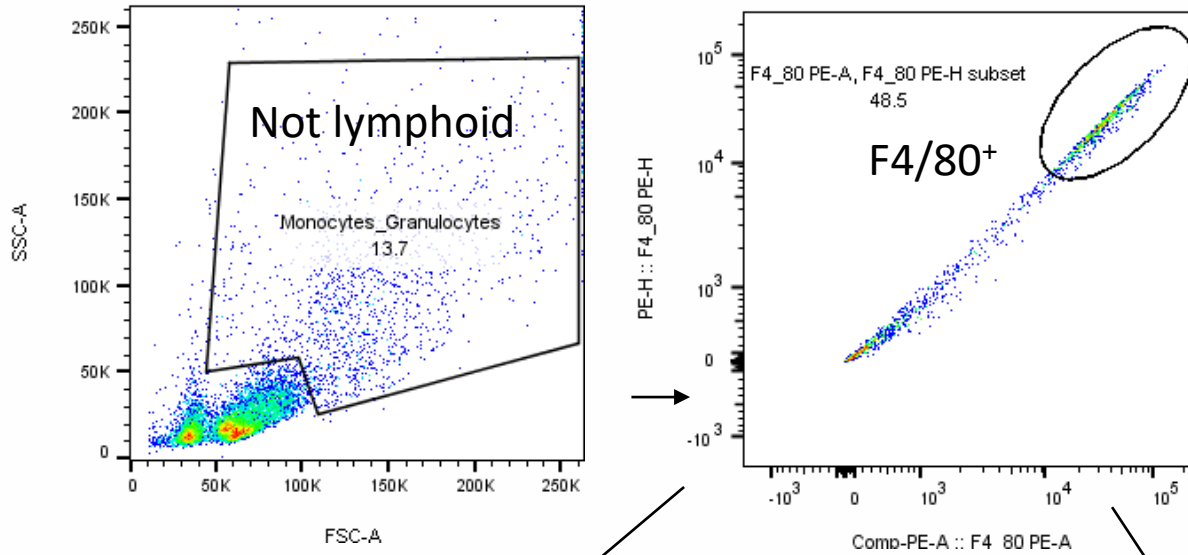

Fig4.A Left  
(vehicle)

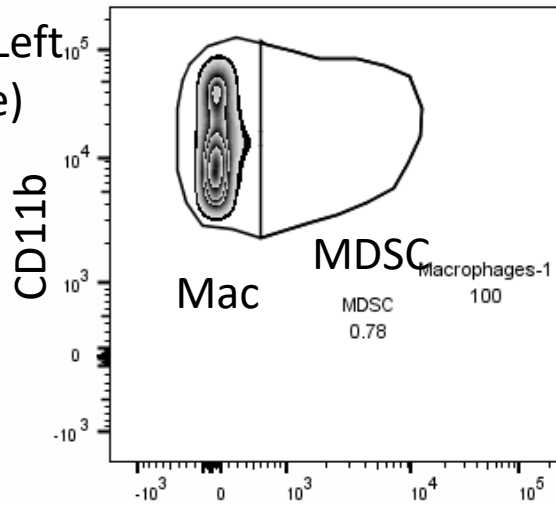

Fig4.A Right  
(PEE)

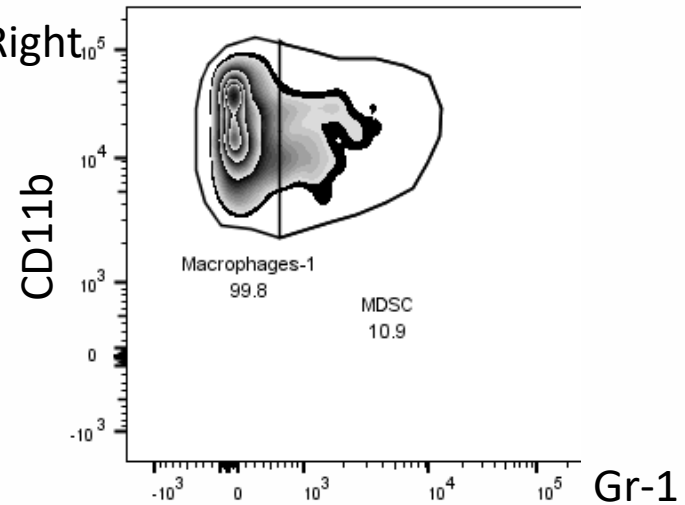

Data were obtained using a FACSVerse (BD Bioscience).



# Peritoneal cells of lean C57B/6 mice

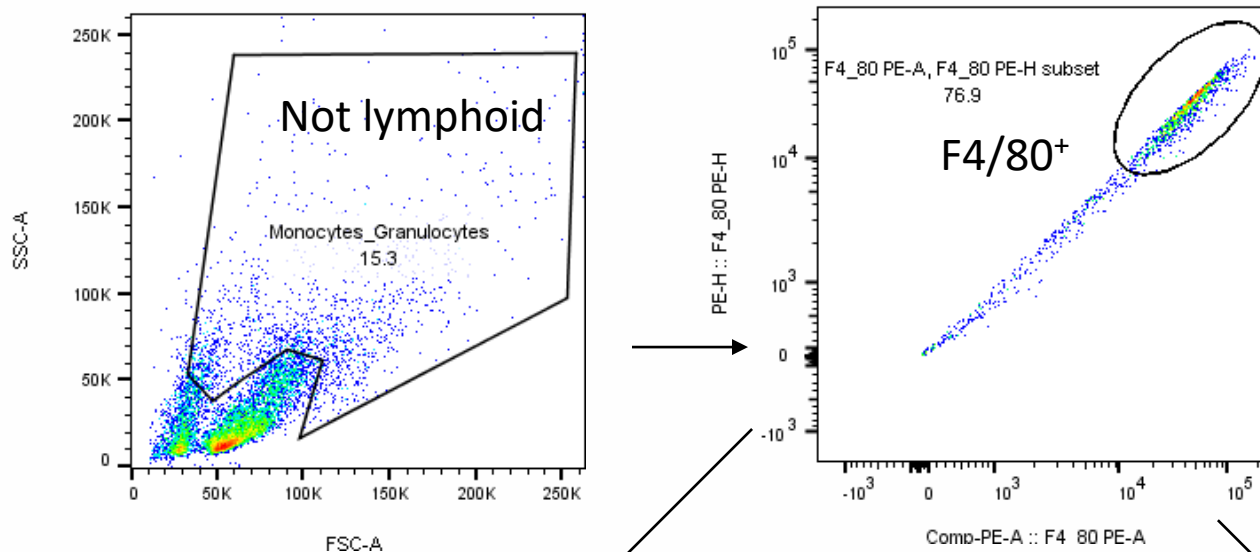

Fig4.C Left  
(vehicle)

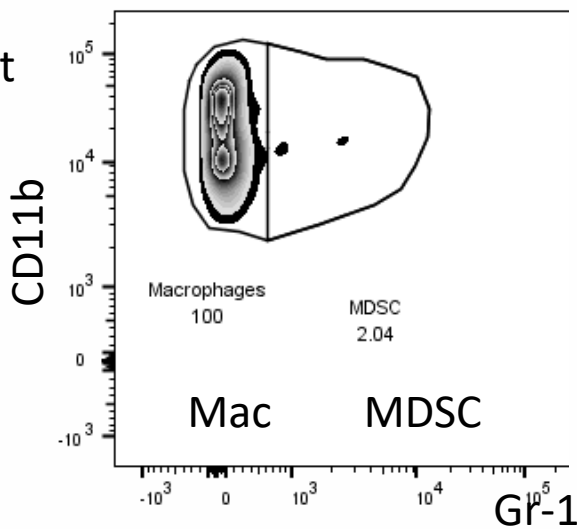

Fig4.C Right  
(PEE)

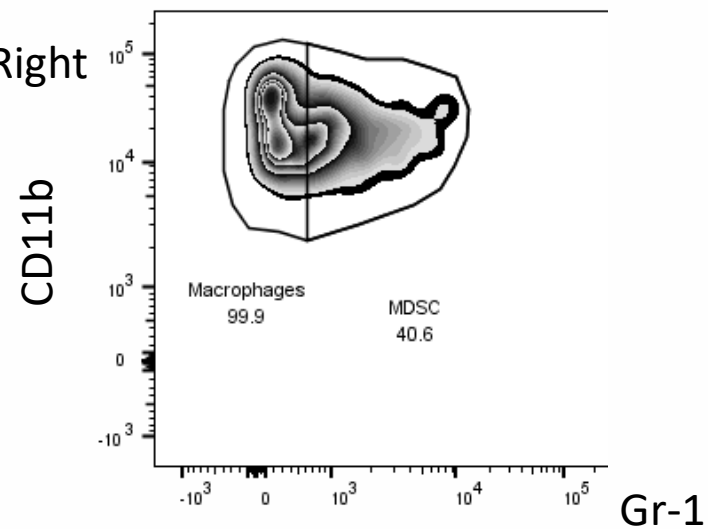

Data were obtained using a FACSVerse(BD Bioscience).

# Epididymal adipose tissue of lean C57BL/6 mice (kaemferol injection)

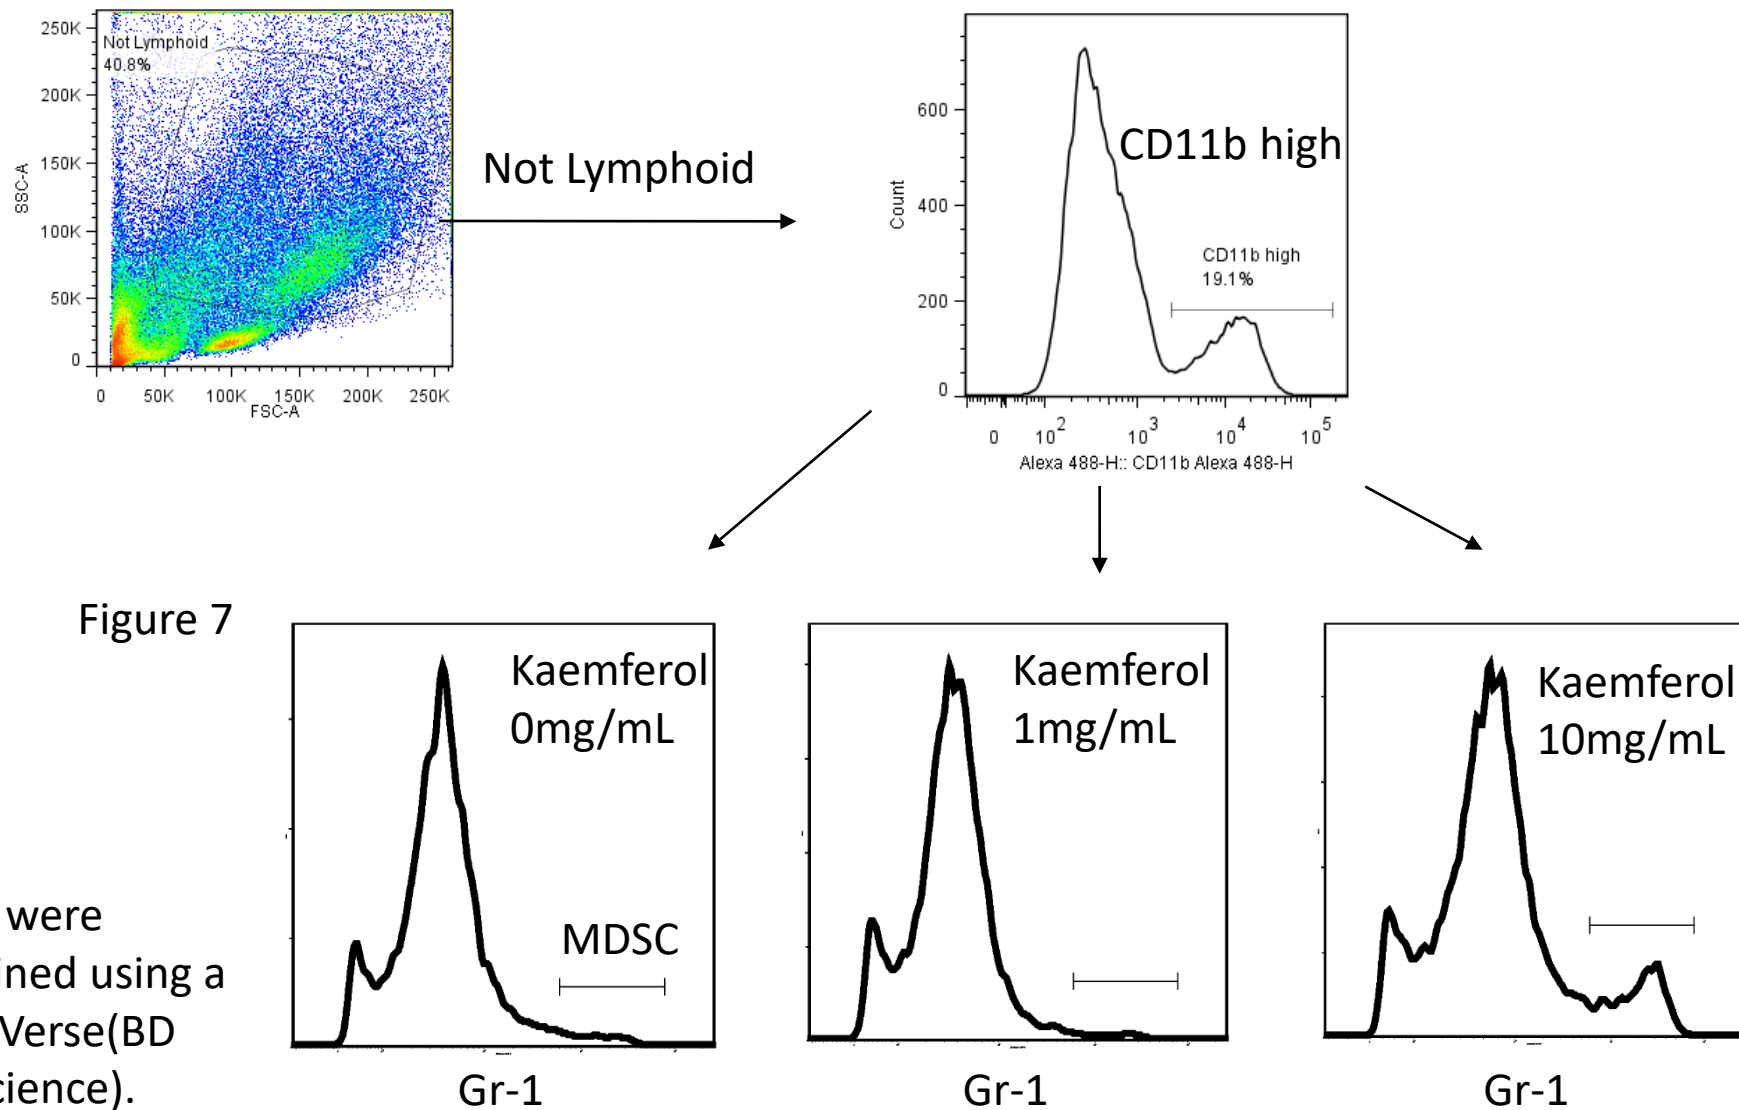

Supplement: MOESM4 [file 15733260]
