# Supplementary material for: Brazilian propolis ethanol extract and its component kaempferol induce myeloid-derived suppressor cells from macrophages of mice in vivo and in vitro
Source: BMC Complement Altern Med. 2018 May 2;18:138. doi: 10.1186/s12906-018-2198-5 (PMC5930496; doi:10.1186/s12906-018-2198-5)
Supplement: Supplementary file 2 — Blood test data of animals for this study after treatments. (XLSX 12 kb) [file 12906_2018_2198_MOESM2_ESM.xlsx]

## Sheet: data
1. Propolis Ethanol Extract (PEE)
Fig.1A		Blood glucose(mg/dL)
	ob/ob(vehicle vs PEE)	vehicle	PEE
	1	255	120
	2	393	174
	3	252	128
	4	400	272
	average	325	173.5
	stdev	82.6196	69.8451
	T-test	0.03113
		Blood glucose(mg/dL)		Triglyceride(mg/dL)		Total chlesterol(mg/dL)		Non-esterified fatty acids(mEq/L)
Fig.1B	ob/ob(vehicle vs PEE)	vehicle	PEE	vehicle	PEE	vehicle	PEE	vehicle	PEE
	1	193	100	151	131	213	189	0.547	0.369
	2	428	141	101	156	259	177	0.369	0.458
	3	500	141	101	161	225	223	0.458	0.488
	4	352	133	129	146	228	196	0.577	0.413
	average	368.25	128.75	120.5	148.5	231.25	196.25	0.48775	0.432
	stdev	131.535	19.5342	24.2418	13.2288	19.6023	19.4829	0.0939197	0.0520961
	T-test	0.01134		0.0894		0.04451		0.3392
		Blood glucose(mg/dL)
Fig.2	HFD(vehicle vs PEE)	vehicle	PEE
Fig.4	1	213	190
	2	262	174
	3	212	165
	4	191	162
	average	219.5	172.75
	stdev	30.0943	12.5797
	T-test	0.04979
		Blood glucose(mg/dL)
Fig.3	Lean(vehicle vs PEE)	vehicle	PEE
Fig.4	1	181	183
	2	184	153
	3	178	170
	4	201	169
	average	186	168.75
	stdev	10.2956	12.2848
	T-test	0.1348
2. Kaemferol
		Blood glucose(mg/dL)
	Lean( several doses of kaemferol)	0	0.11	1	10
	1	151	124	136	128
Fig.7	2	133	119	132	121
	3	151	129	128	143
	4	177	142	135	183
	average	153	128.5	132.75	143.75
	stdev	18.1108	9.88264	3.59398	27.7293
	ANOVA	0.23659
